# Supplementary material for: Thermoelectric properties of Cu4Ge3Se5with an intrinsic disordered zinc blende structure
Source: Royal Society of Chemistry journal article supplement (doi:10.1039/c9ta14068a), 2020-01-01
Supplement: c9ta14068a1.pdf [file c9ta14068a1.pdf]

### Supplemental Information

#### Thermoelectric properties of $\text{Cu}_4\text{Ge}_3\text{Se}_5$ with an intrinsic disordered zinc blende structure

Bing Shan, Siqi Lin\*, Zhonglin Bu, Jing Tang, Zhiwei Chen, Xinyue Zhang, Wen Li and Yanzhong Pei\*

Interdisciplinary Materials Research Center, School of Materials Science and Engineering, Tongji Univ., 4800 Caoan Rd.,  
Shanghai 201804, China.

\*Email: [linsiqi0811@163.com](mailto:linsiqi0811@163.com); [yanzhong@tongji.edu.cn](mailto:yanzhong@tongji.edu.cn)

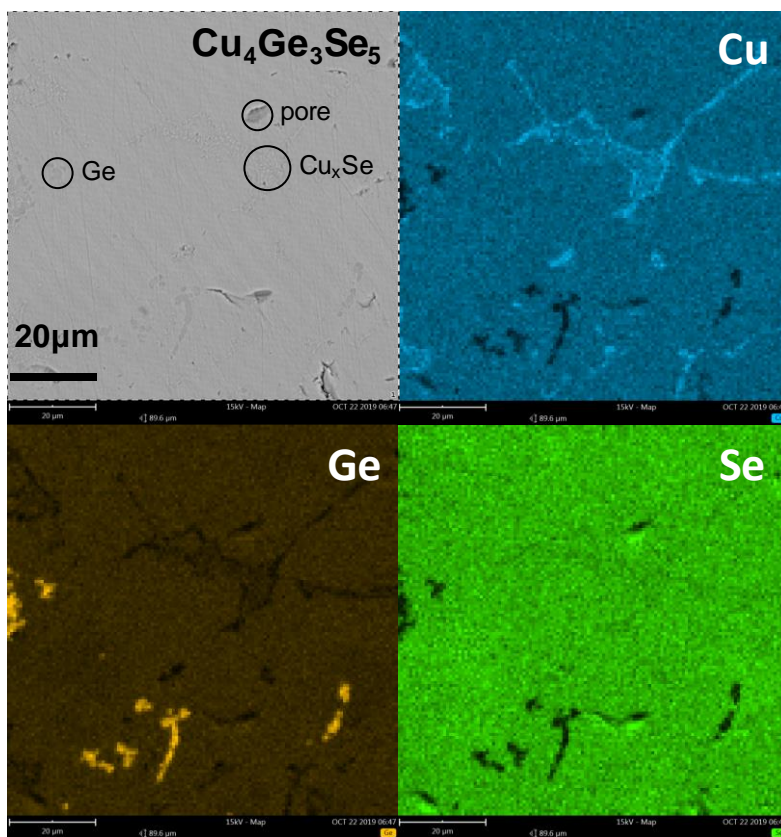

Figure S1. The SEM images for  $\text{Cu}_4\text{Ge}_3\text{Se}_5$  with Ge and  $\text{Cu}_x\text{Se}$  precipitates.

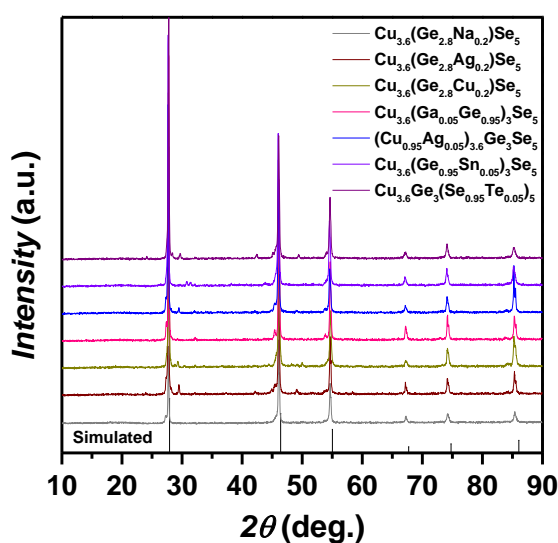

Figure S2. The XRD patterns for doped  $\text{Cu}_{3.6}\text{Ge}_3\text{Se}_5$ .

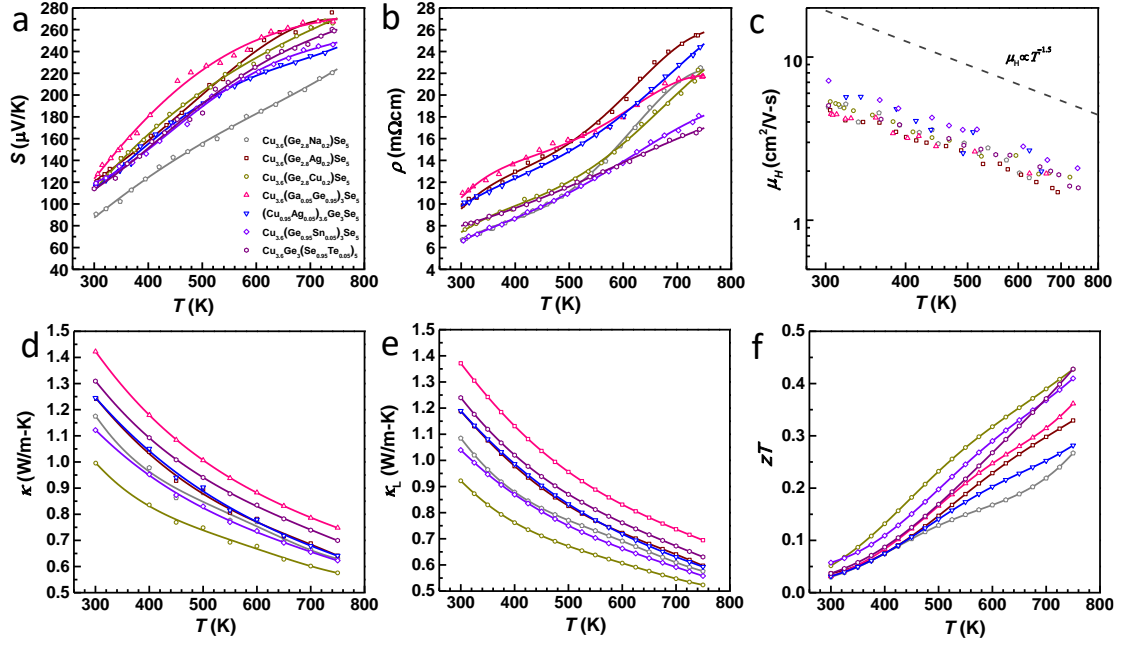

Figure S3. Temperature dependent Seebeck coefficient (a), resistivity (b), Hall mobility (c), total thermal conductivity (d) and lattice component (e), and  $zT$  (f) for doped  $\text{Cu}_{3.6}\text{Ge}_3\text{Se}_5$ .

Table S1. Room temperature Hall carrier concentration ( $n_H$ ), transverse ( $v_t$ ), longitudinal ( $v_l$ ) and mean ( $v$ ) sound velocities, bulk ( $B$ ) and shear ( $G$ ) modulus, Grüneisen parameter ( $\gamma$ ) as well as Debye temperature ( $\Theta_D$ ) for doped  $\text{Cu}_{3.6}\text{Ge}_3\text{Se}_5$ .

| Composition                                                      | $n_H$<br>( $10^{20} \text{ cm}^{-3}$ ) | $v_t$<br>(m/s) | $v_l$<br>(m/s) | $v$<br>(m/s) | $B$<br>(GPa) | $G$<br>(GPa) | $\gamma$ | $\Theta_D$<br>(K) |
|------------------------------------------------------------------|----------------------------------------|----------------|----------------|--------------|--------------|--------------|----------|-------------------|
| $\text{Cu}_{3.6}(\text{Ge}_{2.8}\text{Ag}_{0.2})\text{Se}_5$     | 1.14                                   | 2130           | 4065           | 2382         | 57.6         | 25.0         | 1.8      | 253               |
| $\text{Cu}_{3.6}(\text{Ge}_{2.8}\text{Cu}_{0.2})\text{Se}_5$     | 1.24                                   | 2146           | 3996           | 2396         | 53.0         | 24.8         | 1.8      | 253               |
| $\text{Cu}_{3.6}(\text{Ga}_{0.05}\text{Ge}_{0.95})_3\text{Se}_5$ | 1.13                                   | 2273           | 4257           | 2539         | 62.0         | 28.5         | 1.8      | 270               |
| $(\text{Cu}_{0.95}\text{Ag}_{0.05})_{3.6}\text{Ge}_3\text{Se}_5$ | 1.02                                   | 2128           | 4089           | 2381         | 58.6         | 24.9         | 1.9      | 252               |
| $\text{Cu}_{3.6}(\text{Ge}_{0.95}\text{Sn}_{0.05})_3\text{Se}_5$ | 1.37                                   | 2252           | 4475           | 2525         | 73.2         | 28.0         | 2.0      | 268               |
| $\text{Cu}_{3.6}\text{Ge}_3(\text{Se}_{0.95}\text{Te}_{0.05})_5$ | 1.56                                   | 2200           | 4215           | 2461         | 62.7         | 26.8         | 1.9      | 261               |
